1 **Polycomb-associated and Trithorax-associated developmental conditions –**  
2 **phenotypic convergence and heterogeneity**

3

4

Alice Smail<sup>1,2</sup>, Eema Jawahiri<sup>1</sup>, Kate Baker<sup>1,3\*</sup>

5

6 1. MRC Cognition and Brain Sciences Unit, University of Cambridge, UK

7 2. Department of Medical & Molecular Genetics, Kings College London, UK

8 3. Department of Medical Genetics, University of Cambridge, UK

9

10 \* Corresponding author: [kate.baker@mrc-cbu.cam.ac.uk](mailto:kate.baker@mrc-cbu.cam.ac.uk)

11

12 Funding support – UKRI/MRC (MC\_UU\_00030/3 to KB)

13

14 Word count 3718

15

16

17  
18  
19  
20  
21  
22  
23  
24  
25  
26  
27  
28  
29  
30  
31  
32  
33  
34  
35  
36  
37  
38  
39  
40  
41  
42  
43  
44  
45  
46  
47

### Abstract

Polycomb group (PcG) and Trithorax group (TrxG) complexes represent two major components of the epigenetic machinery. This study aimed to delineate phenotypic similarities and differences across developmental conditions arising from rare variants in PcG and TrxG genes, using data-driven approaches.

462 patients with a PcG or TrxG-associated condition were identified in the DECIPHER dataset. We analysed Human Phenotype Ontology (HPO) data to identify phenotypes enriched in this group, in comparison to other monogenic conditions within DECIPHER. We then assessed phenotypic relationships between single gene diagnoses within the PcG and TrxG group, by applying semantic similarity analysis and hierarchical clustering. Finally, we analysed patient-level phenotypic heterogeneity in this group, irrespective of specific genetic diagnosis, by applying the same clustering approach. Collectively, PcG/TrxG diagnoses were associated with increased reporting of HPO terms relating to integument, growth, head & neck, limb and digestive abnormalities. Gene group analysis identified three multi-gene clusters differentiated by microcephaly, limb/digit dysmorphologies, growth abnormalities and atypical behavioural phenotypes. Patient-level analysis identified two large clusters differentiated by neurodevelopmental abnormalities and facial dysmorphologies respectively, as well as smaller clusters associated with more specific phenotypes including behavioural characteristics, eye abnormalities, growth abnormalities and skull dysmorphologies. Importantly, patient-level phenotypic clusters did not align with genetic diagnoses. Data-driven approaches can highlight pathway-level and gene-level phenotypic convergences, and individual-level phenotypic heterogeneities. Future studies are needed to understand the multi-level mechanisms contributing to both convergence and variability within this population, and to extend data collection and analyses to later-emerging health characteristics.

**Keywords:** Polycomb, Trithorax, epigenetic, Mendelian, phenotypes, hierarchical clustering

48  
49

## Introduction

50 Chromatin remodelling is a fundamental epigenetic mechanism that orchestrates development and  
51 maintains the stability of differentiated tissues. Polycomb group (PcG) and Trithorax group (TrxG) multi-  
52 subunit complexes have key roles in chromatin remodelling, and act antagonistically to regulate  
53 chromatin accessibility by inducing the repression and activation of gene expression respectively <sup>1,2</sup>. PcG  
54 complexes mediate transcriptional repression by promoting nucleosomal compaction, as well as  
55 deterring TrxG action <sup>1,3,4</sup>. TrxG complexes (including COMPASS methyltransferases and BAF (SWI/SNF)  
56 remodelling complexes) maintain active gene expression and oppose PcG action by relaxing  
57 nucleosomal compaction <sup>1,3,4</sup>. A tightly regulated balance of PcG and TrxG activity is thus necessary for  
58 the precise timing of gene expression during mammalian development; in particular, the PcG-TrxG  
59 system has a vital role in neurogenesis, by mediating the balance of neural progenitor cell differentiation  
60 and self-renewal <sup>5</sup>.

61 Multiple developmental conditions arise from pathogenic variants in PcG and TrxG genes, forming a  
62 subset of Mendelian Disorders of Epigenetic Machinery (MDEMs) <sup>6</sup>. Whilst individually rare, PcG and TrxG-  
63 related conditions collectively account for approximately 8% of monogenic developmental disorders in  
64 the DECIPHER database <sup>7</sup>. These conditions are phenotypically heterogeneous, with variability within and  
65 across different genetic diagnoses. It has been suggested that while MDEMs are monogenic, they are  
66 conceptually similar to complex disorders, with epigenomic dysregulations contributing to an array of  
67 different phenotypes and severities via downstream pathways <sup>8</sup>. Patients with different PcG and TrxG-  
68 related conditions can share overlapping phenotypic characteristics: for example, broad similarities can  
69 be observed between BAF- and COMPASS-complex associated conditions <sup>9-14</sup>. It is plausible that  
70 phenotypic similarities across conditions are due to epigenomic dysregulation at shared genomic loci  
71 and at similar developmental stages, leading to downstream effects on gene expression that affect  
72 convergent developmental pathways. However, there are also phenotypic divergences within this group:  
73 for example, opposing features relating to growth have been observed amongst PcG-related conditions  
74 arising from variants in PRC1, PRC2 and PR-DUB complex genes <sup>2,5</sup>. Phenotypic descriptions of each  
75 MDEM in isolation may not fully capture the extent of overlap or distinctiveness between conditions, and  
76 may underplay the extent of variability within each condition. A phenotypic evidence base that accounts  
77 for this complexity could improve post-diagnostic counselling and stimulate hypothesis driven, clinically  
78 relevant research.

79 The current paper reports data-driven analysis, aiming to describe the phenotypic commonalities and  
80 heterogeneities of PcG and TrxG-related conditions. Our first objective was to identify phenotypes that  
81 occur at elevated frequencies across the population of patients with PcG and TrxG-associated conditions,  
82 in comparison to other monogenic conditions that are present in the DECIPHER dataset. If phenotypic  
83 enrichments exist for this broad group of conditions, this reinforces the evidence for pathway-level  
84 convergence in developmental mechanisms and clinical needs. Our second objective was to map gene-  
85 level heterogeneity within PcG and TrxG-related conditions. To do this, we investigated whether there are  
86 phenotypic clusters of PcG and TrxG-associated conditions when patient data are grouped by affected  
87 gene. If gene-driven clusters are present, this supports the recognition of clinical syndromes aligning with  
88 variants across several specific genes, and may point to shared epigenomic dysregulations. Our third  
89 objective was to map patient-level heterogeneity to explore whether there are phenotypic clusters of  
90 patients with PcG and TrxG-associated conditions; the results of this final analysis may support or  
91 challenge the alignment between MDEM-associated phenotype co-occurrences and variants in specific  
92 genes.

93

## 94 **Materials and Methods**

### 95 *Gene List Curation*

96 Gene Ontology (GO) annotations were used to collate a comprehensive PcG and TrxG gene list  
97 (Supplementary Figure 1A), following a similar approach to Ciptasari and van Bokhoven<sup>15</sup>. GO Cellular  
98 Component terms selected to represent PcG complexes were 'PRC1 complex' (GO:0035102), 'ESC/E(Z)  
99 complex' (synonymous with 'PRC2 complex'; GO:0035098) and 'PR-DUB complex' (GO:0035517). To  
100 gather terms related to SWI/SNF and COMPASS complexes, several child terms of 'SWI/SNF  
101 superfamily-type complex' (GO:0070603) and three terms that correspond to the three subtypes of  
102 COMPASS complex were selected. After collating 114 genes using relevant GO terms, a further 21 genes  
103 that are likely to possess PcG/TrxG involvement were added based on literature reviews, and 6 genes  
104 that lack direct or specific PcG/TrxG involvement were removed (Supplementary Table 1). This resulted in  
105 a final list of 129 PcG/TrxG genes.

### 106 *Cohort and phenotypes curation*

107 The DECIPHER database is a repository of genotypic and Human Phenotype Ontology (HPO) standardised  
108 phenotypic data deposited by clinical geneticists and laboratory scientists<sup>7,16</sup>. The DECIPHER open

109 access dataset was filtered using the pre-defined PcG/TrxG gene list, to identify all pathogenic or likely  
110 pathogenic sequence variants located in a PcG-related or TrxG-related gene (Supplementary Figure 1B).  
111 506 variants that were present across 499 patients were identified; importantly, all patients with more  
112 than one variant had variants present in the same gene. Patients with 0 HPO terms were removed  
113 (n=37), resulting in a cohort of 462 patients with pathogenic or likely pathogenic variants across 38  
114 PcG/TrxG genes. 99 patients had PcG variants, 359 patients had TrxG variants, and 4 patients had  
115 variants in *HCFC1* which has roles in both PcG (PR-DUB accessory subunit) and TrxG (SET1A/B-COMPASS  
116 complex subunit). All patients with autosomal variants were heterozygous (n=447), while all patients with  
117 X-linked variants were hemizygous (n=15). The majority (81%) of patients in this cohort had a *de novo*  
118 variant, while 13% had unknown inheritance and 6% had a maternally or paternally inherited variant. To  
119 obtain a comparison cohort, the remainder of the DECIPHER dataset was filtered to include unique  
120 patients with pathogenic or likely pathogenic sequence variants, and patients with 0 HPO terms were  
121 removed (n=5070).

#### 122 *Group-level HPO enrichment analysis*

123 To address the first study objective, the HPO terms reported for each patient were propagated using the  
124 Python package PyHPO, so that broader 'top-level/parent' phenotypes could be compared across groups,  
125 in addition to more specific 'lower-level/child' phenotypes<sup>16</sup>. The median number of reported HPO terms,  
126 and top-level HPO terms for each patient in the PcG/TrxG and comparison cohorts were compared via  
127 Mann-Whitney U rank tests. We then compared the frequency of propagated HPO terms between the  
128 PcG/TrxG and comparison cohorts, using a two-proportions z-test with Benjamini-Hochberg correction for  
129 multiple testing (Figure 1a). First, we examined whether any top-level HPO terms were enriched in the  
130 PcG/TrxG population: for this analysis the top-level term 'Abnormality of the musculoskeletal system'  
131 was split into the descendent terms 'Abnormality of the skeletal system', 'Abnormality of the  
132 musculature' and 'Abnormality of connective tissue', which resulted in a total of 25 top-level HPO terms  
133 (Supplementary Table 2). Second, we examined lower-level term enrichments.

#### 134 *Gene-level HPO analysis*

135 Figure 1b details the approach taken to examine gene-associated phenotypes within PcG- and TrxG-  
136 related conditions. This involved grouping patients by genetic condition, identifying a set of  
137 representative HPO terms of each gene group, and computing semantic similarity scores, before  
138 performing cluster analysis to identify phenotypic similarity between gene groups. To identify

139 'representative' HPO terms for each gene group, unique propagated HPO terms were collated, and  
140 depending on gene group size, HPO terms present in at least 2 patients or 20% of patients were retained  
141 (Supplementary Table 3). At this stage, each gene group contained a variable number of HPO terms, with  
142 some groups containing higher or lower number of terms. This could impact the cluster analysis  
143 outcomes by biasing the gene groups with similar numbers of HPO terms to artefactually cluster  
144 together. To reduce this bias, the number of HPO terms per group were approximately equalised. Based  
145 on the interquartile range of the number of terms across all gene groups, the cut off for the minimum  
146 and maximum number of terms retained per gene group were determined (i.e., removing outliers). The  
147 HPO terms retained within the set limit were prioritised based on their information content (IC)<sup>17,18</sup>. The  
148 IC of HPO terms is a measure of the rarity/ specificity of a term within a database, where the IC of term t  
149 is given by,  $IC(t) = -\log p(t)$ , and  $p(t)$  is the probability of occurrence of t. Thus, terms with higher IC reflect  
150 more specific and clinically informative terms. As such, in this analysis, terms with higher IC were  
151 prioritised to be retained within the IQR set limit of number of terms.

152 Next, the semantic similarity scores and pairwise gene group similarity scores for each pair of gene  
153 groups was computed, using the graph IC method followed by the funSimAvg method<sup>18</sup>. This approach  
154 takes into account all common ancestors of pairs of terms. The resulting similarity matrix was used as  
155 input for clustering. The method of cluster analysis chosen for this study was agglomerative hierarchical  
156 clustering using complete linkage; hierarchical clustering does not require a pre-specified number of  
157 clusters, which is useful for this study, as the number of different phenotypic profiles across the cohort  
158 was not known before clustering. Clustering was carried out using scikit-learn and SciPy packages in  
159 Python, and number of clusters was selected via visual inspection of the dendrogram<sup>19</sup>. To illustrate  
160 phenotype sharing between genes which leads to clustering, networks of semantic similarity were  
161 visualised using Cytoscape. The method used to select HPO terms for network visualisation is detailed in  
162 Supplementary Table 4: in brief, terms were included if present in at least 4 gene groups, terms with  
163 listed descendent terms were excluded, and some terms were merged to provide clearer visualisation.

#### 164 *Patient-level HPO analysis*

165 Figure 1c outlines the second approach for identifying phenotypic clusters, which involved directly  
166 computing the semantic similarity between patients, prior to performing hierarchical clustering. Raw  
167 HPO terms associated with each patient were collated. Modifier terms as well as terms with descendent  
168 terms were removed (i.e. parent term was removed if its child term is present). Similar to the gene-level

169 pre-processing approach, the number of HPO terms associated with each patient were approximately  
170 equalised by identifying the upper outlier term frequency ( $Q3 + 1.5 \times IQR$ ) across all patients and using  
171 this as an upper limit with terms prioritised by highest IC. The semantic similarity between each pair of  
172 patients was then computed, before performing hierarchical clustering as described previously. Following  
173 clustering, HPO terms associated with each patient were propagated and the proportion of patients with  
174 each term in each cluster was compared to the proportion of patients with each term outside of each  
175 cluster, using Fisher's exact test with a Benjamini-Hochberg correction. HPO terms that were significantly  
176 enriched ( $p_{adj} < 0.05$ ) in each cluster were identified.

177

## 178 **Results**

### 179 *Group-level HPO enrichment analysis*

180 The number of HPO terms per patient for the PcG- and TrxG-associated conditions and comparison  
181 cohorts are displayed in Supplementary Figure 2. There is a significant distribution shift ( $p=1.51e-10$ )  
182 towards a higher number of reported HPO terms for patients with PcG- and TrxG-associated conditions  
183 (median = 7) relative to the remainder of the DECIPHER dataset (median = 6). Similarly, using top-level  
184 HPO terms as a proxy for the number of organ systems affected, there is a significant shift ( $p=1.51e-13$ )  
185 towards a higher number of top-level HPO terms across patients with PcG- and TrxG-associated  
186 conditions (median = 5) relative to the remainder of the DECIPHER dataset (median = 4). Together, these  
187 findings indicate an increased number of phenotypes per patient, and a larger breadth of affected  
188 organs/organ systems, in patients with PcG- and TrxG-associated conditions compared to other  
189 monogenic conditions.

190 Using propagated terms for each patient, the percentage occurrence of top-level HPO terms among  
191 patients with PcG and TrxG-associated conditions was compared to the percentage occurrence of each  
192 term across the remainder of the DECIPHER dataset. Five top-level terms were significantly increased at  
193  $p_{adj} < 0.005$  among patients with PcG and TrxG-associated conditions (Figure 2, Supplementary Table 5):  
194 'Abnormality of the integument' ( $p_{adj}=2.04e-09$ ), 'Growth abnormality' ( $p_{adj}= 5.44e-08$ ), 'Abnormality of  
195 head or neck' ( $p_{adj}=1.33e-06$ ) 'Abnormality of the digestive system' ( $p_{adj}= 4.04e-06$ ), 'Abnormality of  
196 limbs' ( $p_{adj}=0.0012$ ). 'Abnormality of the nervous system' was also marginally increased at  $p_{adj}=0.019$ .  
197 No top-level terms were significantly reduced in the PcG/TrxG group. The distribution of each top-level  
198 term across each genetic condition is illustrated in Supplementary Figure 4; it can be observed that a

199 substantial proportion of patients with each PcG and TrxG-associated condition have abnormalities of the  
200 head or neck, integument, limbs and nervous system, while growth abnormalities and digestive system  
201 abnormalities are more unevenly distributed.

202 Supplementary Table 6 lists specific HPO terms which were significantly increased or decreased at  
203  $p_{\text{adj}} < 0.05$ , and that have a percentage difference of at least  $\pm 3\%$  between the PcG/TrxG group and  
204 comparison group. 66 descendent terms of the 6 significantly enriched top-level terms were also  
205 significantly enriched in the PcG/TrxG group, and 2 descendent terms were significantly reduced  
206 ('Seizure' and 'Abnormality of skull size'; Figure 2). 5 additional terms not descended from enriched top-  
207 level terms were significantly increased in the PcG/TrxG group. In summary, despite the genetic  
208 heterogeneity of PcG-related and TrxG-related conditions, there are detectable differences between this  
209 amalgamated population and the broader developmental disorders population: we observed differences  
210 in the median number of reported phenotypes, and differences across broad and specific phenotype  
211 frequencies.

#### 212 *Gene-level HPO analysis: semantic similarity, clustering and network analysis*

213 Representative HPO terms for each genetic diagnosis are listed in Supplementary Table 3. The  
214 computed semantic similarity matrix was used to perform hierarchical clustering (Figure 3A), resulting in  
215 three multi-gene clusters and 2 stand-alone gene groups. We examined clusters for potential bias arising  
216 from HPO term frequencies across each cluster (Supplementary Figure 3). Network analysis was applied  
217 to visualise the broad shared phenotypic characteristics of each cluster – for visualisation purposes,  
218 networks are presented separately for "Abnormalities of the nervous system" (Figure 3B) and descendent  
219 terms of "Head and neck abnormality", "Abnormality of limbs", "Abnormality of the integument" and  
220 "Growth abnormality" (Figure 3C). Broadly, it can be observed that genes within cluster 1 share growth  
221 abnormalities (including terms relating to overgrowth and restricted growth) and atypical behaviour;  
222 genes within cluster 3 share abnormalities of brain morphology, particularly microcephaly; genes within  
223 clusters 2 and 3 share limb abnormalities and facial dysmorphology. There was no clear pattern of  
224 PcG/TrxG complex membership aligning with phenotypic cluster membership i.e. COMPASS and PcG  
225 associated genes were distributed across all three clusters, while BAF complex genes were clustered into  
226 clusters 2 and 3.

#### 227 *Patient-level HPO analysis: phenotypic similarity, clustering and cluster comparisons*



228 To identify clusters of patients with phenotypic similarity within the PcG- and TrxG-associated conditions  
229 population, irrespective of specific genetic diagnosis, hierarchical clustering was performed on the  
230 unpropagated HPO terms for each individual patient. Following inspection of the dendrogram (Figure 4A),  
231 the population of patients was divided into 12 clusters, varying in size between 3 and 111 patients; this  
232 number of clusters was selected as it provides good insight into sub-clusters across the population,  
233 without separating larger clusters into smaller very similar clusters. Supplementary Figure 3 shows the  
234 HPO term numbers across each cluster. The phenotypic profile of each of the 12 clusters was then  
235 analysed using propagated patient-level terms, with significantly enriched terms identified at  $p_{adj} < 0.05$   
236 (Supplementary Table 7). Figure 4B summarises the two most significant HPO terms for each cluster.  
237 Cluster 1 contains the largest number of patients (n=111) and is enriched for a collection of  
238 neurodevelopmental abnormalities, particularly neurological speech impairment, in addition to abnormal  
239 muscle tone. Cluster 2 (n=91) is characterised by various abnormal facial morphologies, and Cluster 3  
240 (n=48) has a higher proportion of patients with behavioural characteristics, including autistic behaviour.  
241 Cluster 4 (n=48) is characterised by abnormalities of the eye, while Cluster 5 (n=32) contains patients  
242 with growth abnormalities – both undergrowth (short stature, growth delay) and overgrowth (tall stature,  
243 overgrowth). Cluster 6 (n=30) is associated with skull dysmorphologies, particularly microcephaly. The  
244 remaining clusters contained 10 or fewer patients and were each defined by more specific HPO terms.

245 Supplementary Figure 5 illustrates the distribution of cluster memberships for patients within each PcG-  
246 and TrxG gene diagnosis group. It can be observed that the majority of gene groups are phenotypically  
247 heterogeneous, and that phenotype clusters are distributed across genes. There are some exceptions,  
248 namely CHD8 (>50% patients within Cluster 11), SETD1A (>50% patients within Cluster 1) and BCOR  
249 (>50% patients within Cluster 12). However the absolute number of patients with each of these genetic  
250 diagnoses is low, hence this variation in proportional cluster membership may occur by chance.

## 251 **Discussion**

252 This paper presents data-driven analyses of the phenotypic landscape of PcG- and TrxG-associated  
253 conditions. These analyses provide important insights into clinical convergences and divergences within  
254 this population, relevant to diagnosis, post-diagnostic counselling and management. Moreover, this study  
255 highlights opportunities and limitations of HPO computational methods for investigating disorder-  
256 associated pathways defined by convergent gene function.

257 We first assessed group-level differences in HPO term frequencies between PcG/TrxG-associated  
258 conditions and other monogenic developmental disorders. PcG/TrxG-associated conditions shared multi-  
259 system characteristics, with significantly increased frequency of abnormalities of growth, limbs, digestive  
260 system, integument and head or neck. More specific HPO terms reported in >20% of PcG/TrxG  
261 individuals include abnormal skin or hair morphology, abnormal ocular or oral morphology, and  
262 abnormal hands or upper limbs. These significant enrichments are useful phenotypic markers for  
263 confirming pathogenicity of PcG/TrxG variants. On the other hand, occurrences of each specific  
264 characteristic affect a minority of the population, emphasising the variability of this population, and need  
265 to assess combinations of phenotypes rather than each in isolation.

266 94% of patients with PcG/TrxG variants are reported to have nervous system abnormality, a modest  
267 elevation compared to other conditions (89%). 'Global developmental delay' (54% cases, 46% controls)  
268 and 'Neurological speech impairment' (25% cases, 19% controls) were also enriched, but terms relating  
269 to severity of developmental delay did not differ between groups. However, the reporting of specific  
270 cognitive and behavioural characteristics is sparse within DECIPHER, and HPO terminology is not  
271 designed for quantification of neurodevelopmental differences. 'Abnormal cerebral white matter  
272 morphology' is an enriched phenotype within the case group highlighting convergence on structural brain  
273 connectivity; seizures are reported at lower frequency (10% cases, 20% controls). Given the prevalence  
274 and variability of neurodevelopmental phenotypes within the PcG/TrxG group, investigation of multi-level  
275 mechanisms linking epigenetic regulation to brain development and cognitive vulnerabilities are  
276 warranted.

277 Building on group-level analysis of phenotype enrichments, our next goal was to assess phenotypic  
278 variability within PcG/TrxG-related conditions. We observed three clusters of genes which share broad  
279 top-level terms but differ in frequency of lower-level terms. Genes within clusters show multi-phenotype  
280 similarity to their within-cluster neighbours, but sparse connectivity to genes in other clusters. The  
281 phenotypes driving cluster separation within this dataset are likely to be partially influenced by the  
282 reporting biases of DECIPHER. However, these results are potentially hypothesis-setting for mechanistic  
283 studies: for example, the high phenotypic similarity between conditions associated with BAF, COMPASS  
284 and PcG subunits may reflect convergent impacts on gene expression<sup>8</sup>. However we also observed  
285 contrasting phenotypic profiles associated with functionally similar genes (for example, KDM6A and  
286 KDM6B); these differences may be influenced by variant-specific, cell-specific or timing-specific effects.

287 The pooled phenotypic profile for each gene does not take into account patient-level heterogeneity<sup>20</sup>.  
288 Therefore, we carried out a second clustering analysis including all patients with at least 4 reported HPO  
289 terms. We identified 12 phenotypically-defined clusters, which do not align with genetic diagnoses.  
290 Smaller clusters are driven by low prevalence phenotypes, whereas larger clusters are characterised by  
291 broad and frequent terms, with more subtle between-cluster differences. Phenotype cluster  
292 memberships may be influenced by unanalysed factors, such as the age of patients at phenotyping, and  
293 variable reporting by clinical geneticists, developmental paediatricians or neurologists. Importantly, gene  
294 groups were distributed across multiple clusters, and the majority of clusters were genetically  
295 heterogeneous, suggesting that phenotyping is not overly influenced by prior expectation of gene-specific  
296 features.

297 These results reinforce the complexity of MDEMs and the potential for early developmental mechanisms  
298 which cascade to system-level consequences that are not predictable by gene alone. However,  
299 limitations of our analyses include variable patient numbers across MDEMs in DECIPHER (more than  
300 50% of the total group have one of four diagnoses), making it difficult to gauge and compare the  
301 phenotypic spectrum of every condition. There are disparities in phenotyping detail across the DECIPHER  
302 dataset - while some patients have an extensive list of fine-grained HPO terms, others have a single  
303 broad term, such as 'Global developmental delay'; this may reflect the reality of a patient's phenotype, or  
304 variations in phenotyping standards. However, we mitigated this bias by prioritising terms with higher IC  
305 (and therefore specificity), and application of a term equalisation step in our pre-processing to mitigate  
306 potential biases arising from disparities in HPO term numbers. Additionally, facial phenotypes and other  
307 specific morphological features can differentiate disorders from each other<sup>21</sup>. The fact that not every  
308 patient has a comprehensive list of specific phenotypes means that subtle dysmorphic differences will  
309 not contribute to our clustering analyses.

310 Our analyses focused on a subset of MDEMs, and future studies may be more informative by taking a  
311 more inclusive strategy to gene selection; we focused on the well-defined PcG and TrxG-associated  
312 complexes, while there is uncertainty as to what constitutes an 'epigenetic' protein involved indirectly in  
313 chromatin structural regulation. Despite this, there remains some ambiguity in our defined gene list: for  
314 example, while USP7 interacts with PRC1 variants, it may not strictly be considered a PcG protein<sup>22</sup>.  
315 Several genes have additional roles beyond the PcG-TrxG system, for example KDM2B functions as a  
316 demethylase at several histone sites, as well as mediating ubiquitination<sup>23</sup>. There are also limitations

317 arising from the classification of variants: this study relies on clinical reporting, and variants that may  
318 only partially explain phenotype were included. Additionally, this study did not take into account variant  
319 consequence; gain-of-function and loss-of-function variants may have different phenotypic  
320 consequences<sup>24,25</sup>.

321 One motivation for elucidating convergent clinical characteristics is that emerging treatment strategies  
322 may apply to a larger cohort beyond single genes. Ciptasari and van Bokhoven suggest that  
323 transcriptomic convergences across different MDEMs could be harnessed to develop effective  
324 interventions<sup>15</sup>. Drugs targeting epigenetic mechanisms or downstream gene expression have the  
325 potential to be efficacious in treating MDEMs<sup>6</sup>. HDAC inhibitors normalised H3K4 methylation and  
326 neurogenesis in a mouse model of Kabuki Syndrome<sup>26</sup>. CRISPR-based methods may also be applicable  
327 to MDEMs<sup>27</sup>. However, a major challenge is that therapies need to be administered at an appropriate  
328 developmental stage. Epigenetic interventions and CRISPR-based therapies risk introducing off-target  
329 changes<sup>6</sup>. The current study indicates that patient-relevant symptom domains are highly variable, hence  
330 target outcomes and therapeutic strategies will need to weigh-up potential benefits and risks on an  
331 individual basis.

332 The data-driven approach of this paper lays the foundation for future work disentangling MDEM-  
333 phenotype relationships at scale. Future phenotyping research and clinical initiatives should move  
334 beyond congenital characteristics to encompass health-related outcomes across the lifespan.

### 335 **Data Availability Statement**

336 The dataset analysed during the current study is available in the DECIPHER open access database  
337 <https://www.deciphergenomics.org/>

### 338 **Code Availability**

339 Code used for this project is available at [github.com/alicesmail12/HPOAnalysis](https://github.com/alicesmail12/HPOAnalysis).

### 340 **References**

- 341 1. Schuettengruber B, Bourbon HM, Di Croce L, Cavalli G: Genome Regulation by Polycomb and  
342 Trithorax: 70 Years and Counting. *Cell* 2017; **171**: 34-57.  
343
- 344 2. Doyle LA, Unlu Bektas F, Chantzantonaki E, Repton C, Derrien A, Illingworth RS: RINGs, DUBs and  
345 Abnormal Brain Growth-Histone H2A Ubiquitination in Brain Development and Disease.  
346 *Epigenomes* 2022; **6**.  
347
- 348 3. Kuehner JN, Yao B: The Dynamic Partnership of Polycomb and Trithorax in Brain Development  
349 and Diseases. *Epigenomes* 2019; **3**: 17-24.

- 350  
351 4. Piunti A, Shilatifard A: Epigenetic balance of gene expression by Polycomb and COMPASS  
352 families. *Science* 2016; **352**: aad9780.  
353  
354 5. Bolicke N, Albert M: Polycomb-mediated gene regulation in human brain development and  
355 neurodevelopmental disorders. *Dev Neurobiol* 2022; **82**: 345-363.  
356  
357 6. Fahrner JA, Bjornsson HT: Mendelian disorders of the epigenetic machinery: postnatal  
358 malleability and therapeutic prospects. *Hum Mol Genet* 2019; **28**: R254-R264.  
359  
360 7. Foreman J, Perrett D, Mazaika E, Hunt SE, Ware JS, Firth HV: DECIPHER: Improving Genetic  
361 Diagnosis Through Dynamic Integration of Genomic and Clinical Data. *Annu Rev Genomics Hum*  
362 *Genet* 2023; **24**: 151-176.  
363  
364 8. Luperchio TR, Boukas L, Zhang L et al: Leveraging the Mendelian disorders of the epigenetic  
365 machinery to systematically map functional epigenetic variation. *Elife* 2021; **10**.  
366  
367 9. Tsurusaki Y, Okamoto N, Ohashi H et al: Mutations affecting components of the SWI/SNF  
368 complex cause Coffin-Siris syndrome. *Nat Genet* 2012; **44**: 376-378.  
369  
370 10. Machol K, Rousseau J, Ehresmann S et al: Expanding the Spectrum of BAF-Related Disorders: De  
371 Novo Variants in SMARCC2 Cause a Syndrome with Intellectual Disability and Developmental  
372 Delay. *Am J Hum Genet* 2019; **104**: 164-178.  
373  
374 11. Kosho T, Okamoto N, Coffin-Siris Syndrome International C: Genotype-phenotype correlation of  
375 Coffin-Siris syndrome caused by mutations in SMARCB1, SMARCA4, SMARCE1, and ARID1A. *Am*  
376 *J Med Genet C Semin Med Genet* 2014; **166C**: 262-275.  
377  
378 12. Sheppard SE, Campbell IM, Harr MH et al: Expanding the genotypic and phenotypic spectrum in a  
379 diverse cohort of 104 individuals with Wiedemann-Steiner syndrome. *Am J Med Genet A* 2021;  
380 **185**: 1649-1665.  
381  
382 13. Faundes V, Newman WG, Bernardini L et al: Histone Lysine Methylases and Demethylases in the  
383 Landscape of Human Developmental Disorders. *Am J Hum Genet* 2018; **102**: 175-187.  
384  
385 14. Koemans TS, Kleefstra T, Chubak MC et al: Functional convergence of histone  
386 methyltransferases EHMT1 and KMT2C involved in intellectual disability and autism spectrum  
387 disorder. *PLoS Genet* 2017; **13**: e1006864.  
388  
389 15. Ciptasari U, van Bokhoven H: The phenomenal epigenome in neurodevelopmental disorders.  
390 *Hum Mol Genet* 2020; **29**: R42-R50.  
391  
392 16. Kohler S, Gargano M, Matentzoglou N et al: The Human Phenotype Ontology in 2021. *Nucleic*  
393 *Acids Res* 2021; **49**: D1207-D1217.  
394  
395 17. Pesquita C, Faria D, Falcao AO, Lord P, Couto FM: Semantic similarity in biomedical ontologies.  
396 *PLoS Comput Biol* 2009; **5**: e1000443.  
397  
398 18. Deng Y, Gao L, Wang B, Guo X: HPOSim: an R package for phenotypic similarity measure and  
399 enrichment analysis based on the human phenotype ontology. *PLoS One* 2015; **10**: e0115692.  
400  
401 19. Pedregosa F VG, Gramfort A, Michel V, Thirion B, Grisel O, et al.: Scikit-learn: Machine Learning in  
402 Python. . *Journal of Machine Learning Research* 2011; **12**: 2825-2830. .  
403  
404 20. Rots D, Jakub TE, Keung C et al: The clinical and molecular spectrum of the KDM6B-related  
405 neurodevelopmental disorder. *Am J Hum Genet* 2023; **110**: 963-978.  
406  
407 21. Bogershausen N, Wolnik B: Mutational Landscapes and Phenotypic Spectrum of SWI/SNF-  
408 Related Intellectual Disability Disorders. *Front Mol Neurosci* 2018; **11**: 252.  
409

- 410 22. Bracken AP, Brien GL, Verrijzer CP: Dangerous liaisons: interplay between SWI/SNF, NuRD, and  
411 Polycomb in chromatin regulation and cancer. *Genes Dev* 2019; **33**: 936-959.  
412
- 413 23. Kang JY, Kim JY, Kim KB *et al*: KDM2B is a histone H3K79 demethylase and induces  
414 transcriptional repression via sirtuin-1-mediated chromatin silencing. *FASEB J* 2018; **32**: 5737-  
415 5750.  
416
- 417 24. Heyn P, Logan CV, Fluteau A *et al*: Gain-of-function DNMT3A mutations cause microcephalic  
418 dwarfism and hypermethylation of Polycomb-regulated regions. *Nat Genet* 2019; **51**: 96-105.  
419
- 420 25. Tatton-Brown K, Seal S, Ruark E *et al*: Mutations in the DNA methyltransferase gene DNMT3A  
421 cause an overgrowth syndrome with intellectual disability. *Nat Genet* 2014; **46**: 385-388.  
422
- 423 26. Nothof SA, Magdinier F, Van-Gils J: Chromatin Structure and Dynamics: Focus on Neuronal  
424 Differentiation and Pathological Implication. *Genes (Basel)* 2022; **13**.  
425
- 426 27. Hilton IB, D'Ippolito AM, Vockley CM *et al*: Epigenome editing by a CRISPR-Cas9-based  
427 acetyltransferase activates genes from promoters and enhancers. *Nat Biotechnol* 2015; **33**:  
428 510-517.  
429  
430
- 431

432

### **Acknowledgments**

433 This work was supported by UKRI/MRC funding (grant number MC\_UU\_00030/3). This study makes use  
434 of data generated by the DECIPHER community. A full list of centres who contributed to the generation of  
435 the data is available from <https://deciphergenomics.org/about/stats> and via email from  
436 [contact@deciphergenomics.org](mailto:contact@deciphergenomics.org). DECIPHER is hosted by EMBL-EBI and funding for the DECIPHER project  
437 was provided by the Wellcome Trust [grant number WT223718/Z/21/Z]. Those who carried out the  
438 original analysis and collection of the data bear no responsibility for the further analysis or interpretation  
439 of the data.

440

### **Author Contribution Statement**

441 AS and KB conceived the study. AS carried out data curation and analysis. EJ provided methodological  
442 advice. KB and AS wrote the manuscript, and all authors reviewed and approved the final version.

443

### **Ethical Approval**

444 The ethical framework for DECIPHER is provided at  
445 [https://www.deciphergenomics.org/files/pdfs/decipher\\_ethical\\_framework.pdf](https://www.deciphergenomics.org/files/pdfs/decipher_ethical_framework.pdf)

446

### **Competing Interests**

447 Nil to declare

448

449 **Figure legends**

450 **Figure 1 - Overview of analysis methods**

451 **Figure 2 - Group-level HPO analysis results.**

452 The proportion of each enriched ( $p_{adj} < 0.05$ ) propagated HPO term among patients with PcG and TrxG-  
453 associated conditions is indicated by the y-axis, relative to the remainder of DECIPHER (x-axis). Terms  
454 with at least a  $\pm 3\%$  change between the PcG/TrxG group and remainder of DECIPHER are shown.  
455 Significantly enriched top-level terms are labelled in bold; also labelled are the two terms with the largest  
456 positive percentage difference and the two terms with the largest negative difference between the  
457 groups.

458 **Figure 3 - Gene-level clustering results.**

459 A) Dendrogram of gene-level clustering output. B) Network illustration of gene relationships within  
460 clusters, based on nervous system abnormalities present in at least 4 gene groups. C) Network  
461 illustration of gene relationships within clusters, based on abnormalities of physical development present  
462 in at least 4 gene groups.

463 **Figure 4 - Patient-level clustering results.**

464 A) Patient-level dendrogram. B) Within-cluster proportional occurrence of top-level terms that were  
465 increased across the population as a whole. C) Within-cluster proportional occurrence of 2 representative  
466 HPO terms for each of the 12 clusters, which were identified using Fisher's exact test.



# Group Analysis

462 patients with P/LP variants  
across 38 TrxG & PcG genes

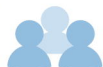

5070 patients with P/LP variants  
across 1037 other genes

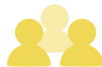

## 1. Propagate HPO terms

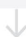

## 2. Compare total number of terms per patient

Mann-Whitney U test was used to compare number of raw terms & number of top-level terms per patient.

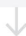

## 3. Identify enriched terms

Terms with a significantly different proportion between the two groups were identified using a two-proportions z-test with BH correction.

# Gene-Level Analysis

462 patients with P/LP variants  
across 38 TrxG & PcG genes

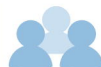

## 1. Propagate HPO terms

Propagated terms were used for this analysis, as patients in one group may not have the exact same phenotype (ie Generalised hypotonia & Axial hypotonia), but they may have the same parent phenotype (ie Hypotonia).

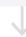

## 2. Identify Gene Groups

Group patients by affected gene & identify representative HPO terms for each group by retaining:

Small Groups ( $n < 6$ )

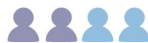

Terms present in at least 2 patients

Larger Gene Groups ( $n \geq 6$ )

Terms present in  $> 20\%$  of patients

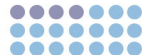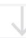

## 3. Approximately equalise HPO terms

Equalise groups with  $n > Q3 + (IQR * 1.5)$  terms, prioritising terms by IC, and remove groups with  $n < Q1$  terms.

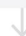

28 gene groups (443 patients)

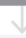

## 4. Compute pairwise semantic similarity

Performed using GraphIC & funSimAvg methods to compute term-term and group-group similarity.

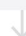

## 5. Hierarchical clustering

Using agglomerative clustering. A dendrogram was used to select an appropriate number of clusters ( $n=5$ ).

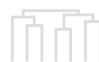

# Patient-Level Analysis

462 patients with P/LP variants  
across 38 TrxG & PcG genes

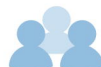

## 1. Remove patients with few terms ( $n < 4$ )

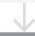

399 patients

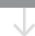

## 2. Approximately equalise HPO terms

Equalise groups with  $n > Q3 + (IQR * 1.5)$  terms, prioritising terms by IC.

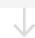

## 3. Compute pairwise semantic similarity

Performed using GraphIC & funSimAvg methods to compute term-term and patient-patient similarity.

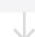

## 4. Hierarchical clustering

Using agglomerative clustering. A dendrogram was used to select an appropriate number of clusters for further analysis ( $n=12$ ).

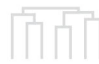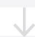

## 5. Identify terms enriched in each cluster

Using Fisher's exact test (inside cluster vs outside) with BH correction.

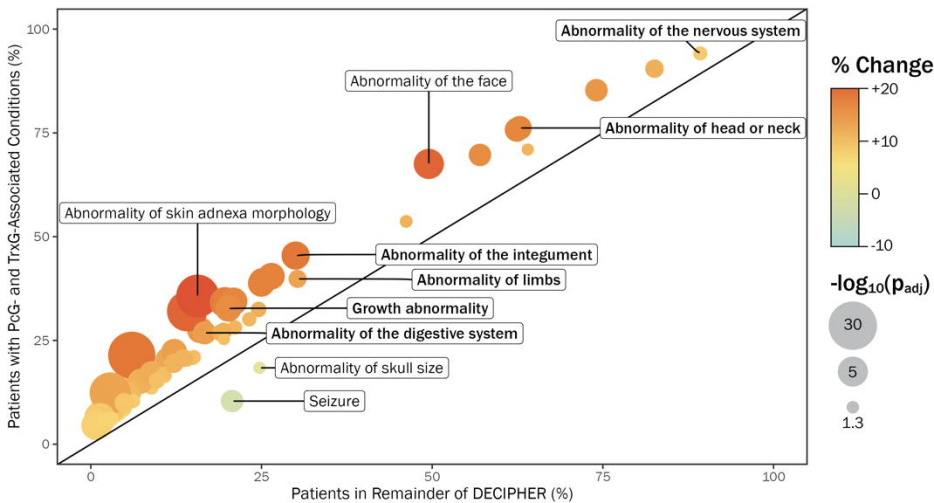

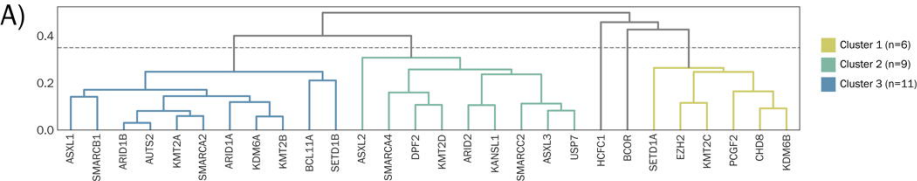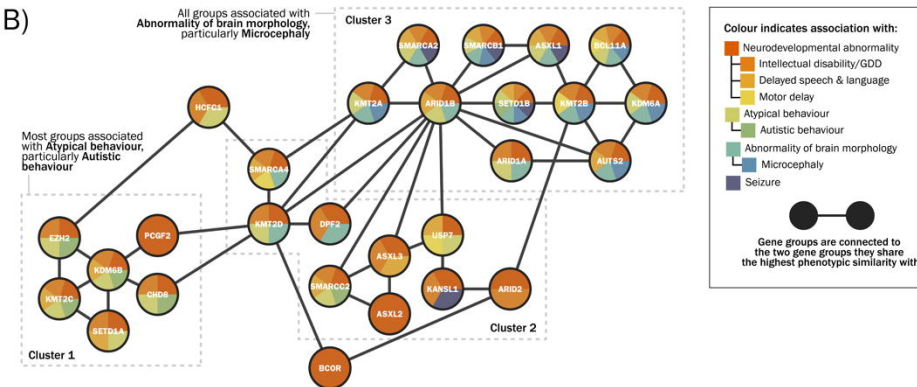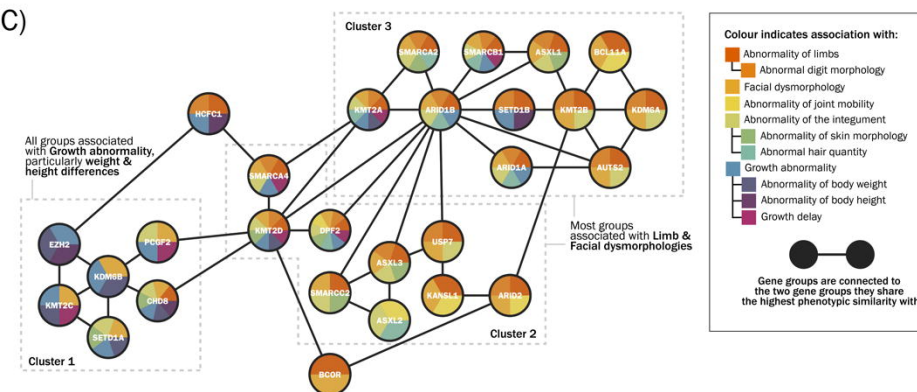

Source: https://medrxiv.org/content/10.1101/2024.07.12.24310328.full.pdf
